# Supplementary material for: Missense mutation of VKORC1 leads to medial arterial calcification in rats
Source: PubMed Central journal article supplement (PMC6137107; doi:10.1038/s41598-018-31788-6), 2018-09-13
Supplement: 41598_2018_31788_MOESM1_ESM.pdf [file 41598_2018_31788_MOESM1_ESM.pdf]

## **Missense mutation of *VKORC1* leads to medial arterial calcification in rats**

Arnaud Michaux<sup>1</sup>, Benjamin Matagrín<sup>1</sup>, Jean-Valéry Deboux<sup>1</sup>, Leon J. Schurgers<sup>2</sup>,  
Etienne Benoit<sup>1</sup>, Virginie Lattard<sup>1,\*</sup>

Supplementary information

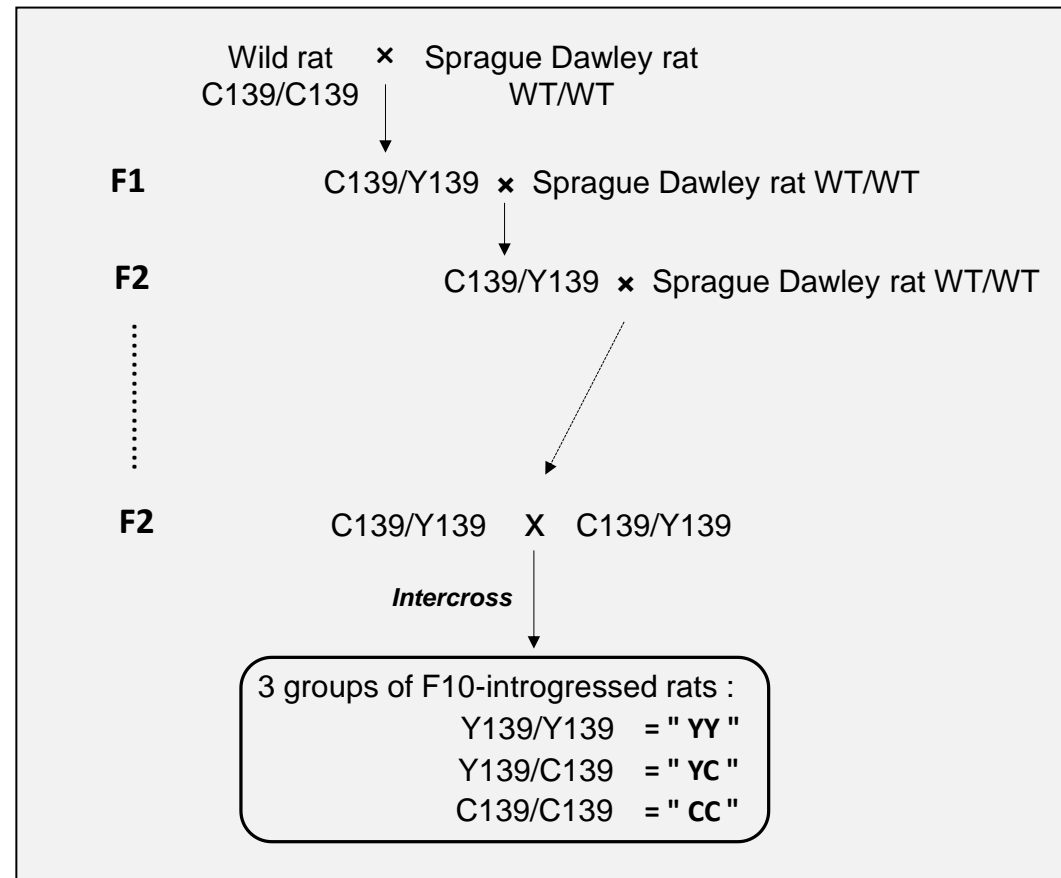

**Supplemental figure 1** : Introgression of C139 mutation into Sprague Dawley *Rattus norvegicus* strain

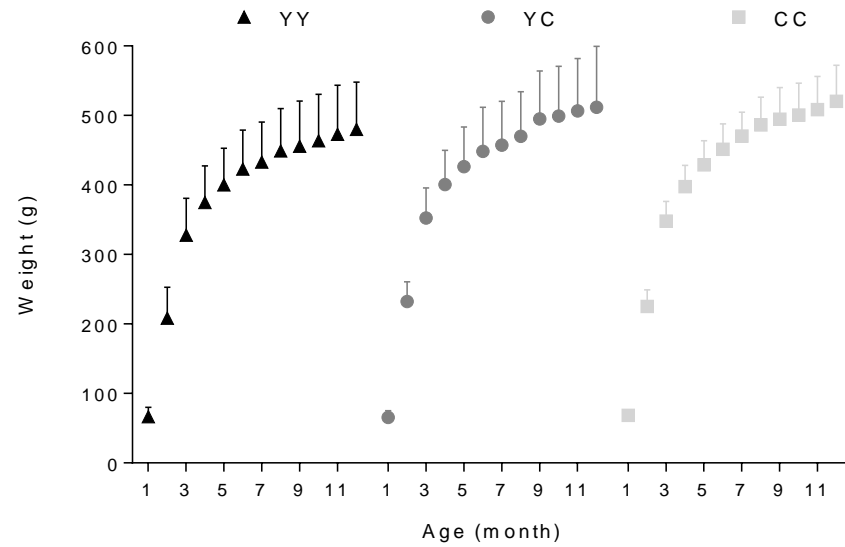

**Supplemental Figure 2:** Weight charts of YY, YC and CC-F10-introgressed rats fed with a standard diet for 1 year

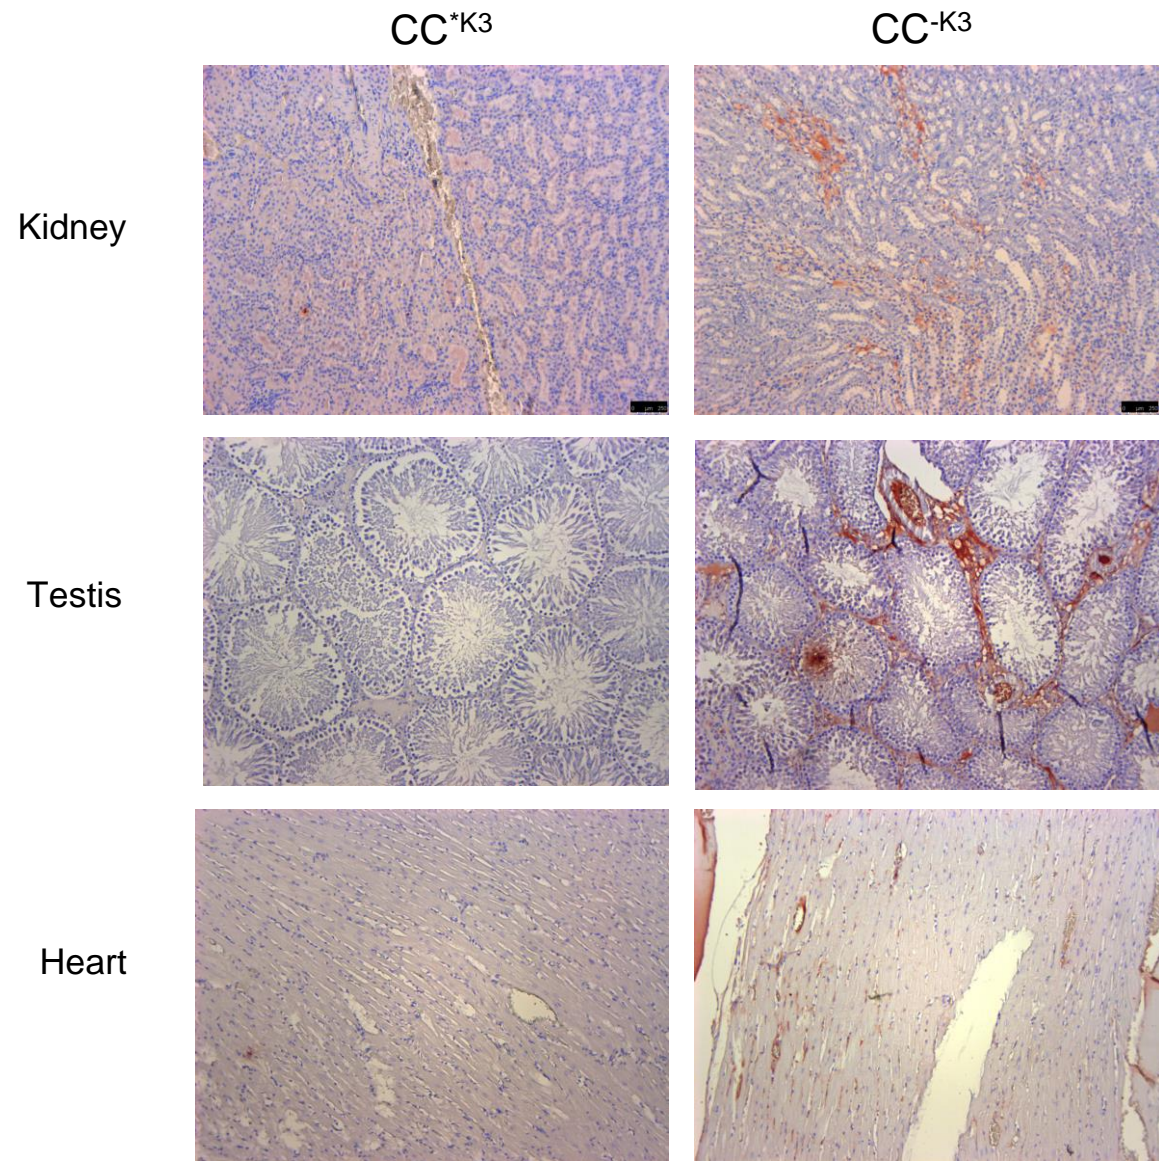

**Supplemental figure 3** : ucMGP immunostaining of various tissues of CC rats feed with (CC<sup>+K3</sup>) or without (CC<sup>-K3</sup>) vitamin K3 during 12 weeks
